# Supplementary material
Source: PubMed Central journal article supplement (PMC6994364)
Supplement: NIHMS1540559-supplement-401_2019_2073_MOESM1_ESM.pdf [file NIHMS1540559-supplement-401_2019_2073_MOESM1_ESM.pdf]

a

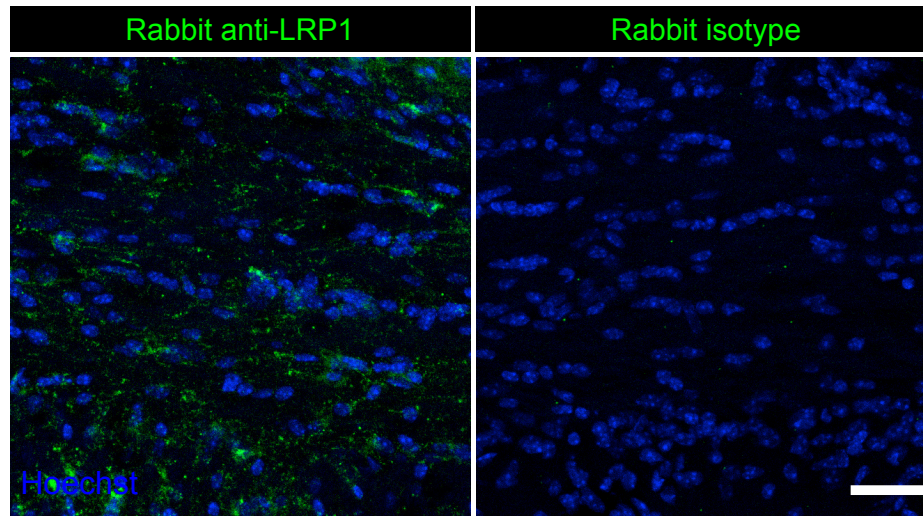

b

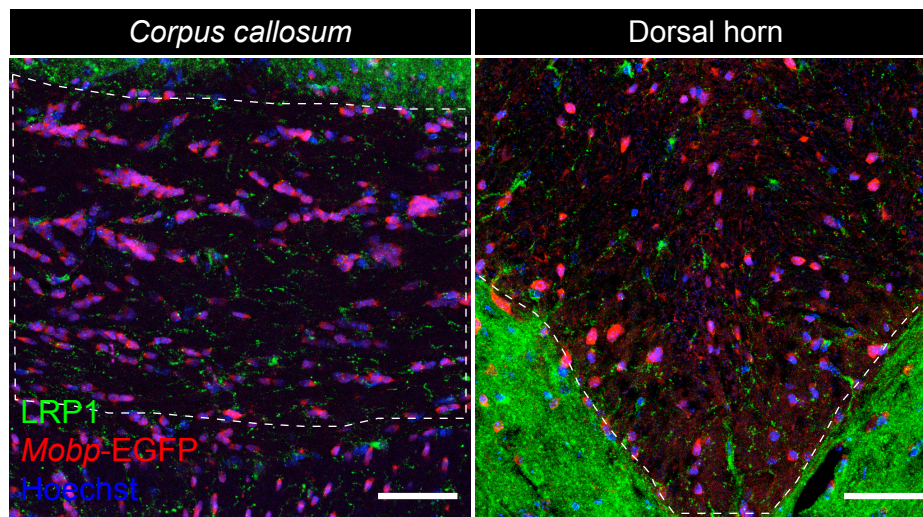

**Fig. S1 LRP1 expression in mature oligodendrocytes** (a) *Corpus callosum* staining with rabbit anti-LRP1 antibody and rabbit isotype control. Scale bar 30 $\mu$ m. (b) Brain (*corpus callosum*) and spinal cord (dorsal horn) slices from *Mbp-EGFP* reporter mice stained for LRP1. Dashed lines demarcate white matter borders. Scale bars 50 $\mu$ m.

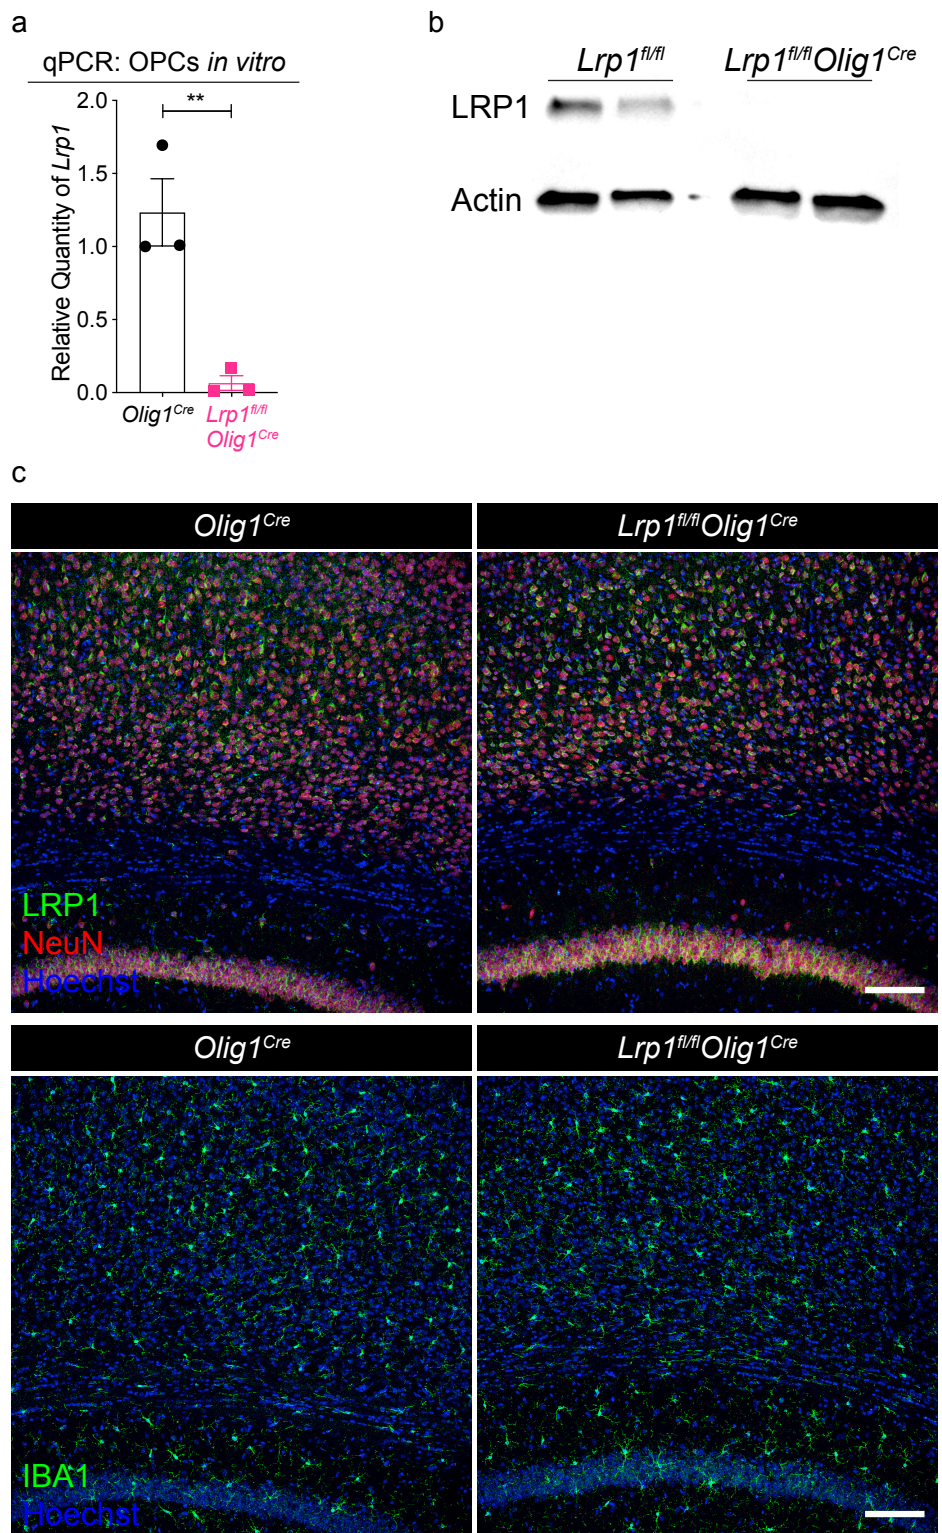

**Fig. S2 Silencing of LRP1 in OPCs does not affect neuronal and myeloid compartments** (a) qPCR for *Lrp1* from cultured OPCs (unpaired t-test, \*\* $p=0.0077$ ;  $n=3$  mice per genotype; error bars represent  $\pm$  SEM). (b) Western blot for LRP1 and actin from cultured OPCs (2 mice per genotype). (c) Cortical slices stained for LRP1 and NeuN from *Olig1<sup>Cre</sup>* and *Lrp1<sup>fl/fl</sup>Olig1<sup>Cre</sup>* mice (upper panels). IBA1 staining in cortical slices from *Olig1<sup>Cre</sup>* and *Lrp1<sup>fl/fl</sup>Olig1<sup>Cre</sup>* mice (lower panels). Scale bar 100 $\mu$ m.

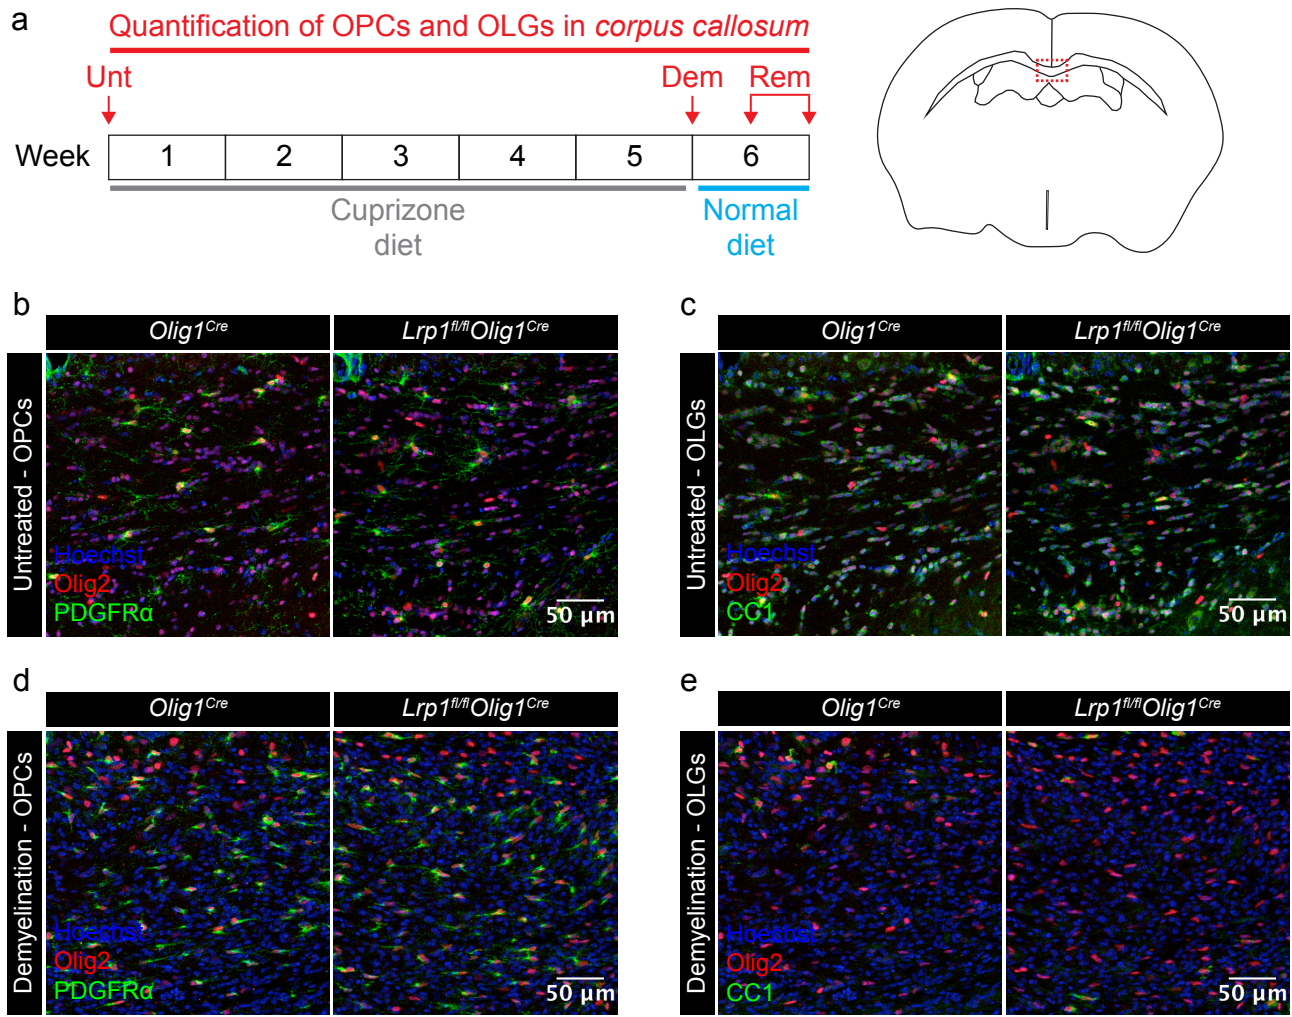

**Fig. S3 OPCs and oligodendrocytes in the naïve and demyelinating *corpus callosum*** (a) Schematic illustrating the cuprizone diet timeline and the timepoints at which the *corpus callosum* was imaged in *Olig1<sup>Cre</sup>* and *Lrp1<sup>fl/fl</sup>Olig1<sup>Cre</sup>* mice. (b) Representative images of OPCs and (c) mature oligodendrocytes in the untreated *corpus callosum*. (d) Representative images of OPCs and (e) mature oligodendrocytes in the demyelinating *corpus callosum*.

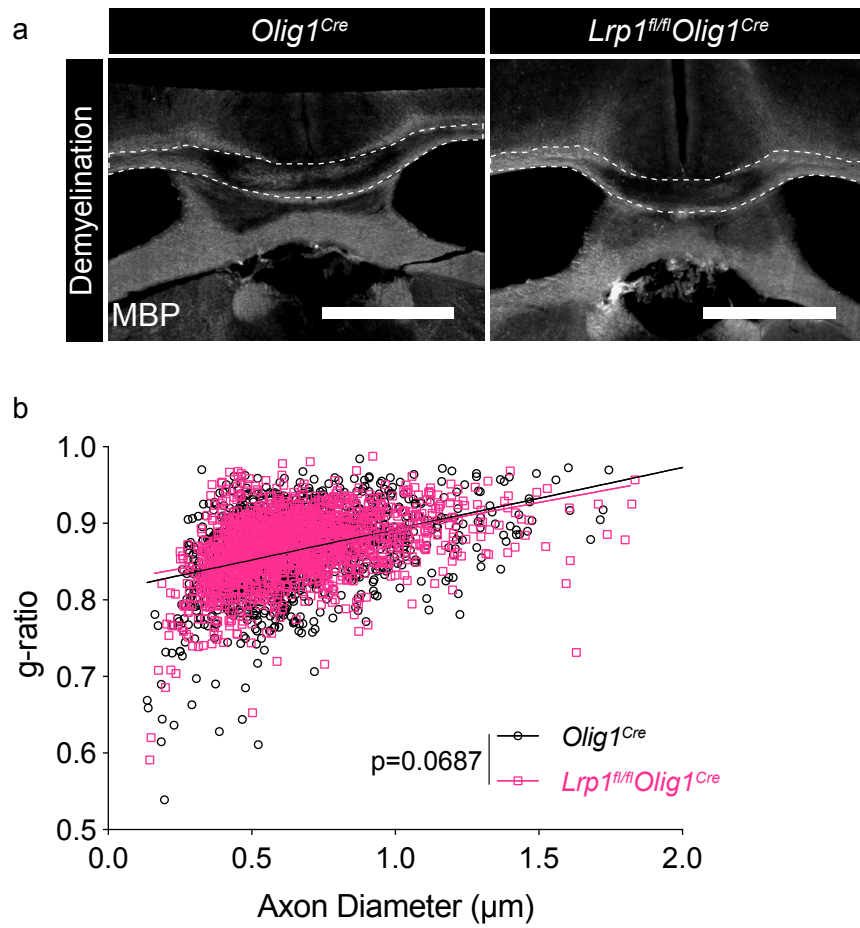

**Fig. S4 MBP staining during demyelination and G-ratio analysis in the remyelinating corpus callosum** (a) MBP immunofluorescence staining at 4 weeks of cuprizone treatment in the corpus callosum of *Olig1<sup>Cre</sup>* and *Lrp1<sup>fl/fl</sup>Olig1<sup>Cre</sup>* mice. Scale bars 1000 $\mu\text{m}$ . (b) Calculated g-ratios from axons in the remyelinating (0.5 Wk Rem) corpus callosum of *Olig1<sup>Cre</sup>* and *Lrp1<sup>fl/fl</sup>Olig1<sup>Cre</sup>* mice (linear regression analysis with slopes comparison).

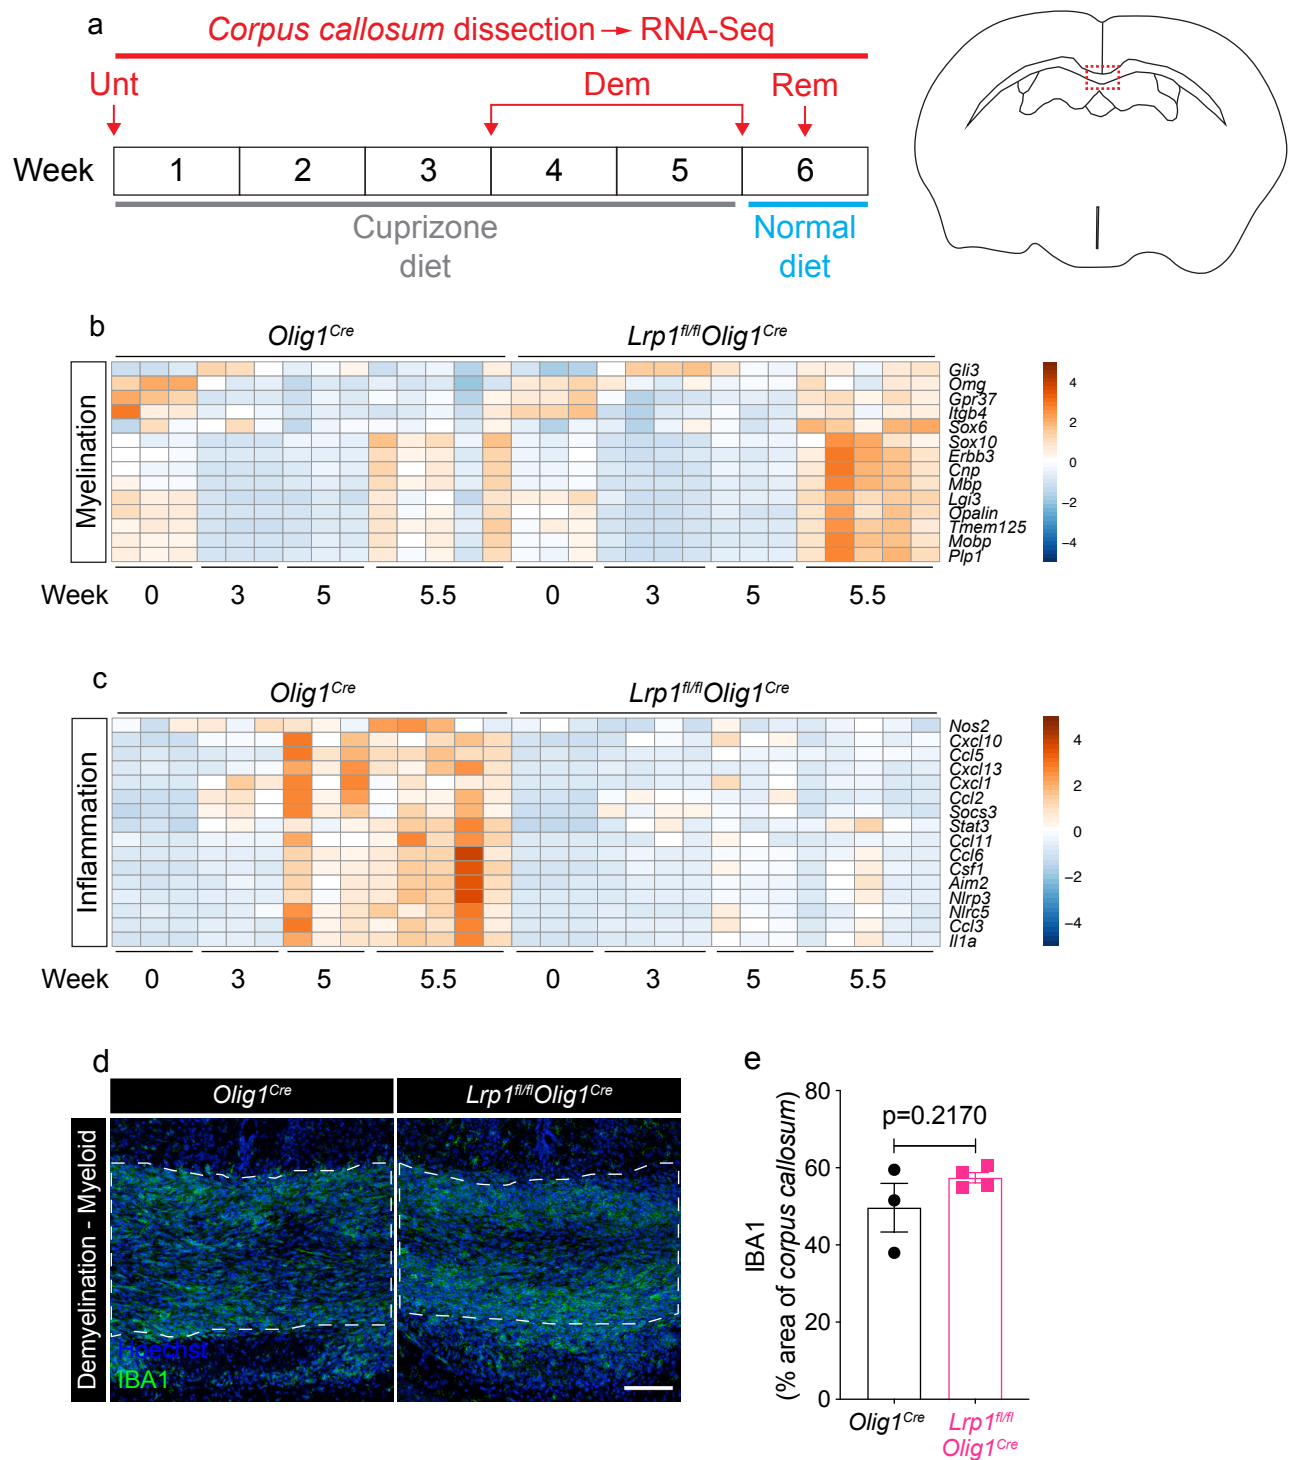

**Fig. S5 RNA-seq analysis of the *corpus callosum* over the course of cuprizone treatment (a)** Schematic illustrating the cuprizone diet timeline and timepoints at which the *corpus callosum* was dissected and analyzed by RNA-seq. **(b)** Heat map of myelination- and **(c)** inflammation-related genes in *Olig1<sup>Cre</sup>* and *Lrp1<sup>fl/fl</sup>Olig1<sup>Cre</sup>* mice. Heat maps have a normalized count scale with z-score normalization. **(d)** Staining and **(e)** quantification of IBA1 in the *corpus callosum* of *Olig1<sup>Cre</sup>* and *Lrp1<sup>fl/fl</sup>Olig1<sup>Cre</sup>* mice after 5 weeks of cuprizone treatment (unpaired t-test; n=3-4 mice per genotype; error bars represent +/- SEM). Scale bar 50µm.

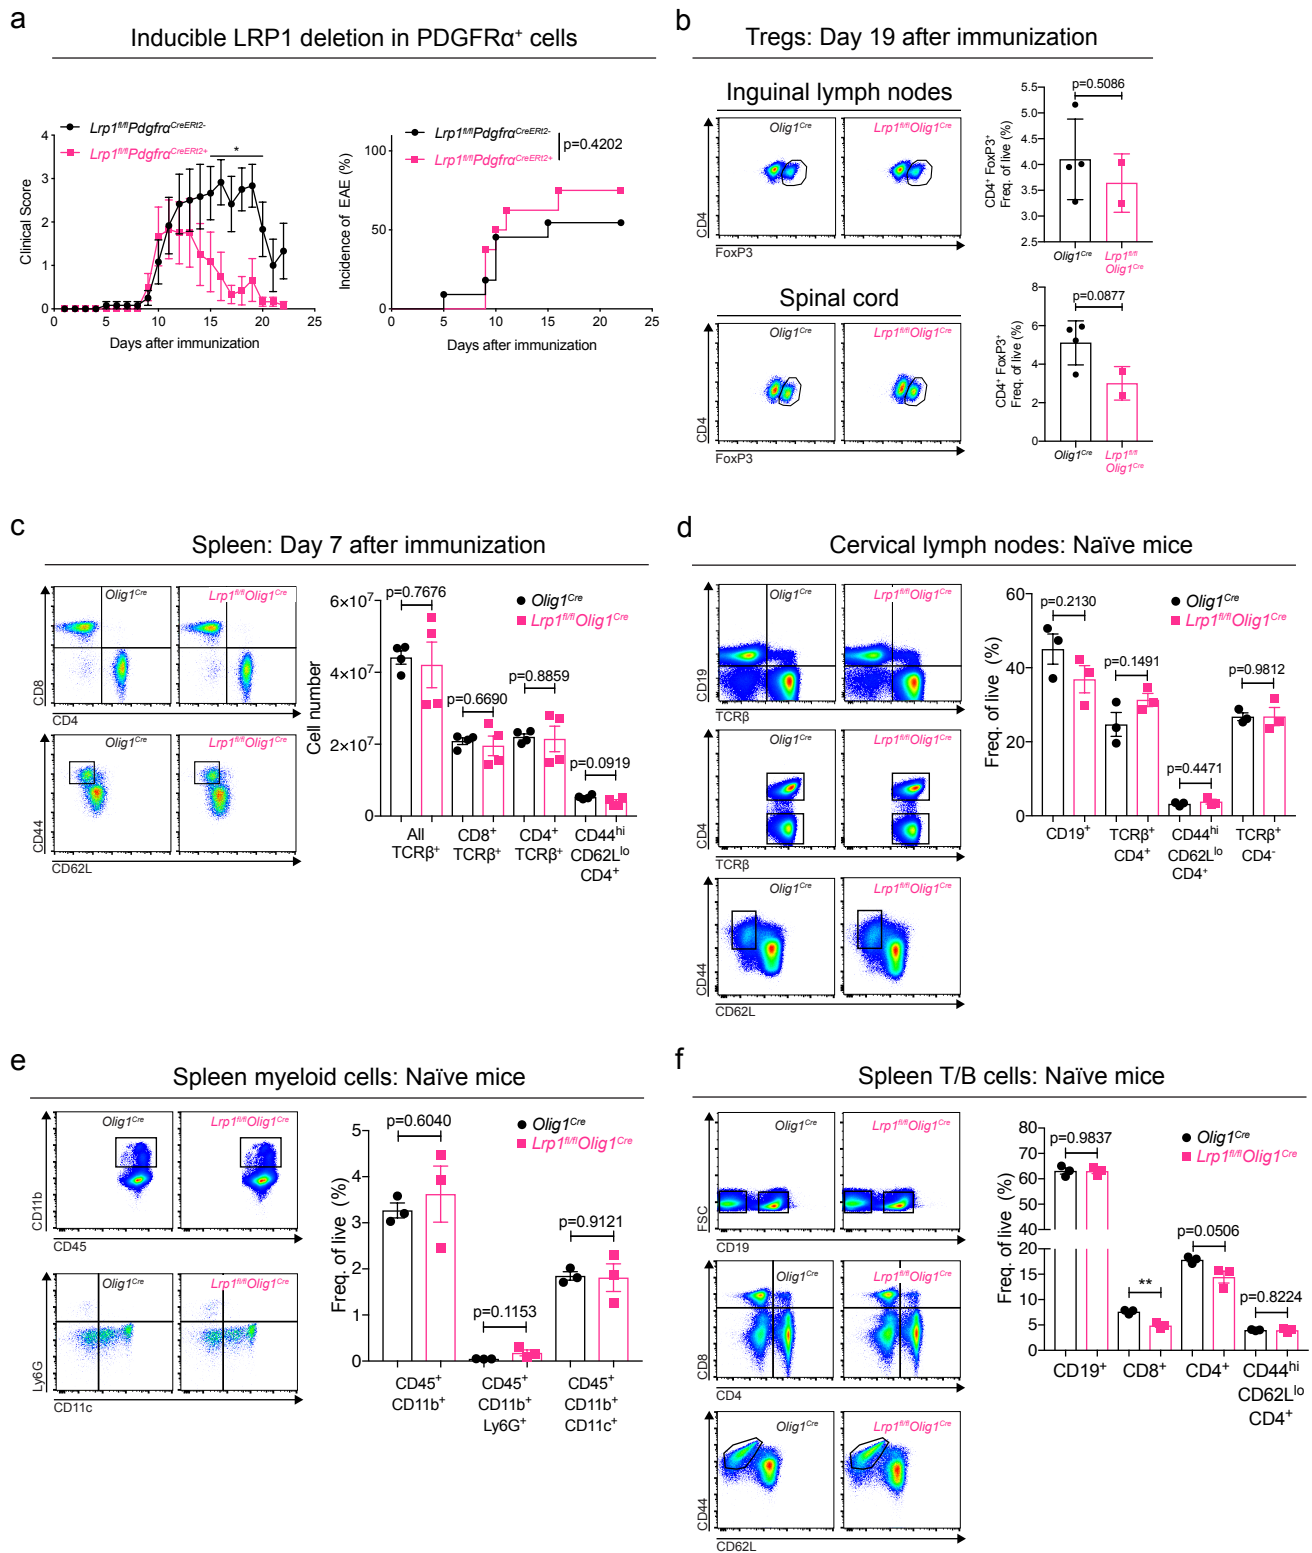

**Fig. S6 Inflammatory phenotype in LRP1-deficient mice is not mediated by peripheral immune defects** (a) EAE clinical scores and incidence from *Lrp1<sup>fl/fl</sup>Pdgrfa<sup>CreERT2</sup>* mice (EAE scores: Mann-Whitney U test, \* $p < 0.05$ ;  $n = 6$  mice with disease per genotype; incidence: Log-rank test;  $n = 8-11$  total mice per genotype). (b) Flow cytometric analysis of Tregs (TCR $\beta^+$  CD4<sup>+</sup> FoxP3<sup>+</sup>) in the draining lymph nodes (inguinal) and spinal cord during EAE in *Olig1<sup>Cre</sup>* and *Lrp1<sup>fl/fl</sup>Olig1<sup>Cre</sup>* mice (unpaired t-test;  $n = 2-4$  mice per genotype). (c) Representative flow plots and quantification of T cell subsets in the spleen 7 days after EAE immunization. (d) T and B cell populations in the cervical lymph nodes of naïve mice. (e) Myeloid cells and (f) T and B cell populations in the spleen of naïve mice (FSC: forward scatter height). Error bars represent  $\pm$  SEM.

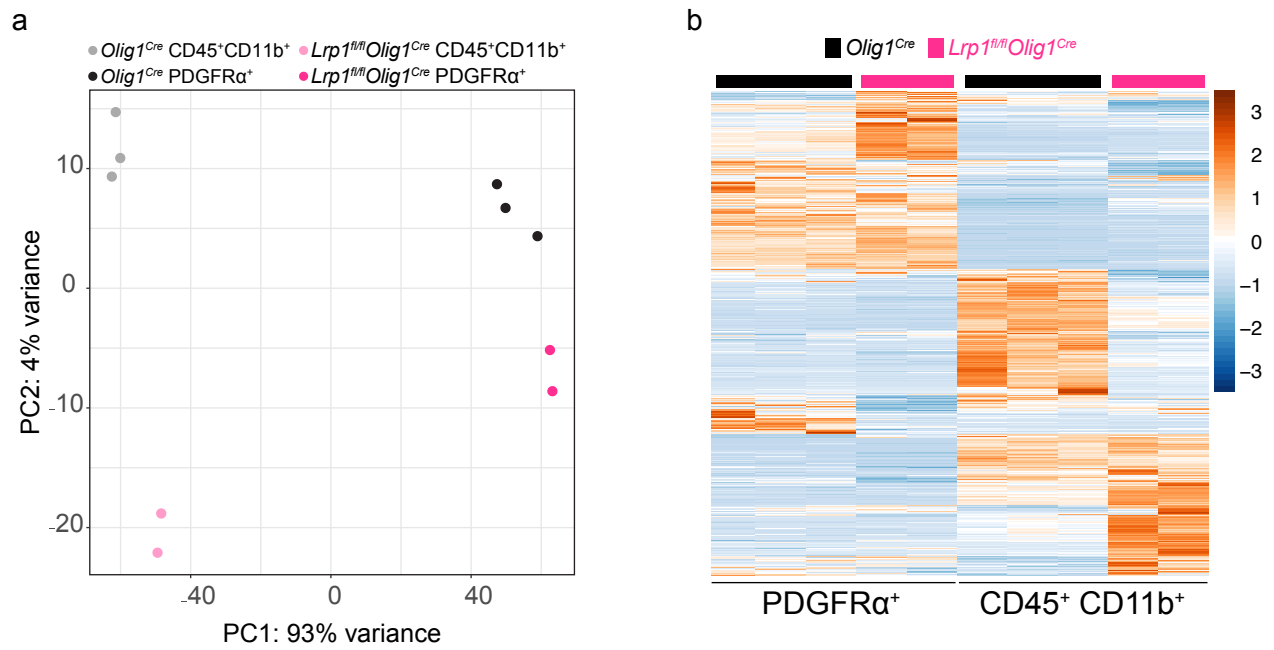

**Fig. S7 Transcriptional profiling of the EAE spinal cord** (a) Principal component analysis (PCA) plot and (b) heat map of the transcriptomes of sorted cells from EAE spinal cords of *Olig1*<sup>Cre</sup> and *Lrp1*<sup>fl/fl</sup>*Olig1*<sup>Cre</sup> mice. Heat maps have a normalized count scale with z-score normalization.

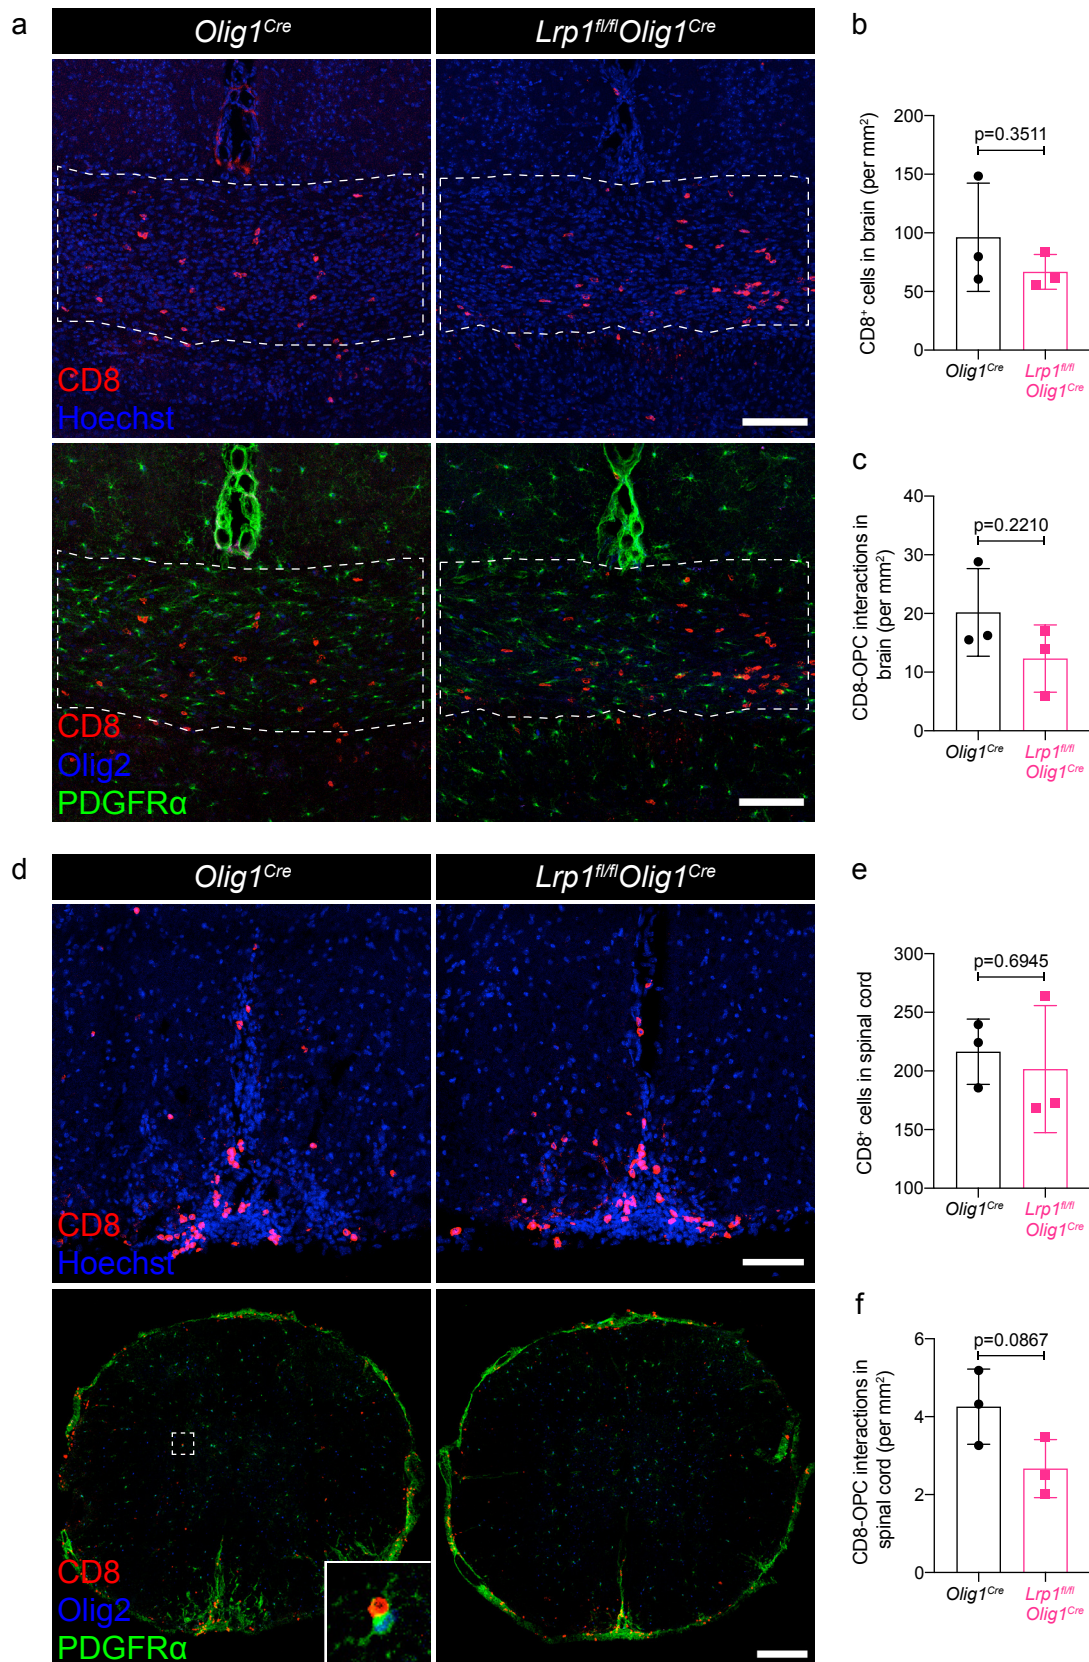

**Fig. S8 CD8 cells in the cuprizone brain and EAE spinal cord.** (a) Staining for CD8 (top panels), Olig2 and PDGFR $\alpha$  (lower panels) in the remyelinating brain (1 Wk Rem) of *Olig1<sup>Cre</sup>* and *Lrp1<sup>fl/fl</sup>Olig1<sup>Cre</sup>* mice (dashed line outlines the *corpus callosum*). Scale bars 100 $\mu$ m. (b) Quantification of CD8 cells and (c) CD8-OPC interactions in remyelinating brains (unpaired t-test; n=3 mice per genotype). (d) Staining for CD8 (top panels), Olig2 and PDGFR $\alpha$  (lower panels) in EAE spinal cords (genotypes have similar disease scores; scale bars 75 $\mu$ m and 200 $\mu$ m, respectively.). (e) Quantification of CD8 cells and (f) CD8-OPC interactions in chronic EAE spinal cords (unpaired t-test; n=3 mice per genotype). Error bars represent  $\pm$  SEM.



**Table S1 Ages of mice at experimental endpoints**

| Figure Panel       | Age (weeks) |
|--------------------|-------------|
| Fig. 1a,b          | 8           |
| Fig. 1d            | 16          |
| Fig. 1e            | 16          |
| Fig. 2a            | 35-42       |
| Fig. 2b-d          | 22          |
| Fig. 2e,f          | 8           |
| Fig. 3b-e cohort 1 | 35-42       |
| Fig. 3b-e cohort 2 | 34          |
| Fig. 3b-e cohort 3 | 22-25       |
| Fig. 3f-h cohort 1 | 34          |
| Fig. 3f-h cohort 2 | 22-25       |
| Fig. 4a,b cohort 1 | 34          |
| Fig. 4a,b cohort 2 | 22-25       |
| Fig. 4c,d          | 17          |
| Fig. 5b-g          | 16-25       |
| Fig. 6a,b cohort 1 | 17-22       |
| Fig. 6a,b cohort 2 | 12-16       |
| Fig. 6c-i          | 17-24       |
| Fig. 6j,k          | 26          |
| Fig. 7a-f cohort 1 | 17-24       |
| Fig. 7a-f cohort 2 | 27          |
| Fig. 7g-j          | 14-17       |
